# Supplementary material for: Standardization of the Optimum Effects of Indole 3-Butyric Acid (IBA) to Control Root Knot Nematode, Meloidogyne enterolobii, in Guava (Psidium guajava L.)
Source: MDPI journal article supplement (doi:10.3390/molecules28041839), 2023-02-15
Supplement: s1 [file s1]

Table S1: Effect of IBA in guava (Lucknow-49) infested with root knot nematode, *M.enterolobii* in soil and root

| Treatments            | Nematode population in 200cc of soil (days) |                              |                              |                              | Nematode population in 5g of root |                             |                             |                      |                             |                            |                              |                             |                              |
|-----------------------|---------------------------------------------|------------------------------|------------------------------|------------------------------|-----------------------------------|-----------------------------|-----------------------------|----------------------|-----------------------------|----------------------------|------------------------------|-----------------------------|------------------------------|
|                       | 0                                           | 45                           | 75                           | 105                          | No of egg masses (days)           |                             |                             | No of females (days) |                             |                            | No of eggs/egg masses (days) |                             |                              |
|                       |                                             |                              |                              |                              | 45                                | 75                          | 105                         | 45                   | 75                          | 105                        | 45                           | 75                          | 105                          |
| T1- IBA- 100 ppm      | 173 <sup>e</sup>                            | 171 <sup>d</sup><br>(0.96)   | 169 <sup>e</sup><br>(1.17)   | 167 <sup>d</sup><br>(1.37)   | 26 <sup>b</sup>                   | 24 <sup>cd</sup><br>(6.42)  | 22 <sup>c</sup><br>(8.22)   | 29 <sup>ab</sup>     | 27 <sup>bc</sup><br>(7.94)  | 25 <sup>b</sup><br>(7.41)  | 198 <sup>bc</sup>            | 191 <sup>bc</sup><br>(3.70) | 189 <sup>c</sup><br>(0.70)   |
| T2- IBA - 400 ppm     | 178 <sup>cde</sup>                          | 176 <sup>bcd</sup><br>(0.94) | 174 <sup>cde</sup><br>(1.13) | 172 <sup>cd</sup><br>(1.15)  | 27 <sup>a</sup>                   | 26 <sup>b</sup><br>(4.81)   | 24 <sup>b</sup><br>(8.85)   | 30 <sup>a</sup>      | 27 <sup>b</sup><br>(8.90)   | 25 <sup>b</sup><br>(7.32)  | 212 <sup>a</sup>             | 206 <sup>a</sup><br>(2.67)  | 207 <sup>a</sup><br>(-0.48)  |
| T3- IBA - 700 ppm     | 186 <sup>ab</sup>                           | 185 <sup>a</sup><br>(0.36)   | 183 <sup>ab</sup><br>(1.08)  | 181 <sup>b</sup><br>(1.45)   | 24 <sup>cd</sup>                  | 23 <sup>e</sup><br>(4.11)   | 22 <sup>cd</sup><br>(5.70)  | 28 <sup>c</sup>      | 26 <sup>c</sup><br>(8.22)   | 24 <sup>bc</sup><br>(6.42) | 206 <sup>ab</sup>            | 203 <sup>a</sup><br>(1.61)  | 202 <sup>ab</sup><br>(0.17)  |
| T4- IBA - 1000 ppm    | 190 <sup>a</sup>                            | 184 <sup>a</sup><br>(2.98)   | 180 <sup>bc</sup><br>(2.34)  | 175 <sup>bcd</sup><br>(2.96) | 26 <sup>b</sup>                   | 23 <sup>de</sup><br>(10.14) | 21 <sup>de</sup><br>(11.24) | 30 <sup>a</sup>      | 24 <sup>d</sup><br>(18.90)  | 21 <sup>d</sup><br>(12.33) | 189 <sup>c</sup>             | 185 <sup>c</sup><br>(1.77)  | 179 <sup>d</sup><br>(3.59)   |
| T5- IBA - 1300 ppm    | 185 <sup>ac</sup>                           | 183 <sup>ab</sup><br>(1.08)  | 180 <sup>bc</sup><br>(1.82)  | 176 <sup>bc</sup><br>(1.86)  | 27 <sup>a</sup>                   | 25 <sup>c</sup><br>(9.62)   | 22 <sup>c</sup><br>(9.36)   | 29 <sup>ab</sup>     | 26 <sup>bc</sup><br>(10.23) | 23 <sup>c</sup><br>(10.14) | 212 <sup>a</sup>             | 206 <sup>a</sup><br>(2.98)  | 209 <sup>a</sup><br>(-1.45)  |
| T6- IBA - 1600 ppm    | 176 <sup>de</sup>                           | 174 <sup>cd</sup><br>(0.95)  | 171 <sup>de</sup><br>(1.53)  | 169 <sup>cd</sup><br>(1.55)  | 25 <sup>c</sup>                   | 23 <sup>e</sup><br>(8.00)   | 21 <sup>de</sup><br>(8.70)  | 28 <sup>bc</sup>     | 26 <sup>c</sup><br>(9.28)   | 23 <sup>c</sup><br>(9.00)  | 199 <sup>bc</sup>            | 199 <sup>ab</sup><br>(0.33) | 198 <sup>b</sup><br>(0.34)   |
| T7- IBA - 2000 ppm    | 181 <sup>bcd</sup>                          | 179 <sup>abc</sup><br>(0.92) | 177 <sup>cd</sup><br>(1.48)  | 174 <sup>bcd</sup><br>(1.51) | 23 <sup>d</sup>                   | 22 <sup>f</sup><br>(7.02)   | 20 <sup>e</sup><br>(7.59)   | 29 <sup>a</sup>      | 27 <sup>bc</sup><br>(8.97)  | 24 <sup>bc</sup><br>(8.67) | 204 <sup>ab</sup>            | 201 <sup>a</sup><br>(1.31)  | 205 <sup>ab</sup><br>(-1.66) |
| T8- Untreated control | 180 <sup>bcde</sup>                         | 183 <sup>a</sup><br>(-1.85)  | 187 <sup>a</sup><br>(-2.18)  | 192 <sup>a</sup><br>(-2.31)  | 27 <sup>a</sup>                   | 29 <sup>a</sup><br>(-6.04)  | 28 <sup>a</sup><br>(2.28)   | 30 <sup>a</sup>      | 28 <sup>a</sup><br>(4.47)   | 31 <sup>a</sup><br>(-8.16) | 201 <sup>ab</sup>            | 201 <sup>a</sup><br>(-0.16) | 204 <sup>ab</sup><br>(-1.49) |

Data are mean of 3 plants per treatment. Means followed by the same letter do not differ significantly ( $P \geq 0.05$ ) according to Fisher's protected LSD test. Values in the parenthesis are percent increased or decreased over initial population
